# Supplementary material for: 3D interconnected porous NiMoO4 nanoplate arrays on Ni foam as high-performance binder-free electrode for supercapacitors
Source: Royal Society of Chemistry journal article supplement (doi:10.1039/c5ta05644f), 2015-01-01
Supplement: c5ta05644f1.pdf [file c5ta05644f1.pdf]

Electronic Supplementary Information

**3D interconnected porous NiMoO<sub>4</sub> nanoplate arrays on Ni foam as  
high-performance binder-free electrode for supercapacitors**

**Liang Huang, Jingwei Xiang, Wei Zhang, Chaoji Chen, Henghui Xu and Yunhui Huang\***

State Key Laboratory of Materials Processing and Die & Mould Technology, School of Materials  
Science and Engineering, Huazhong University of Science and Technology, Wuhan, Hubei  
430074, China

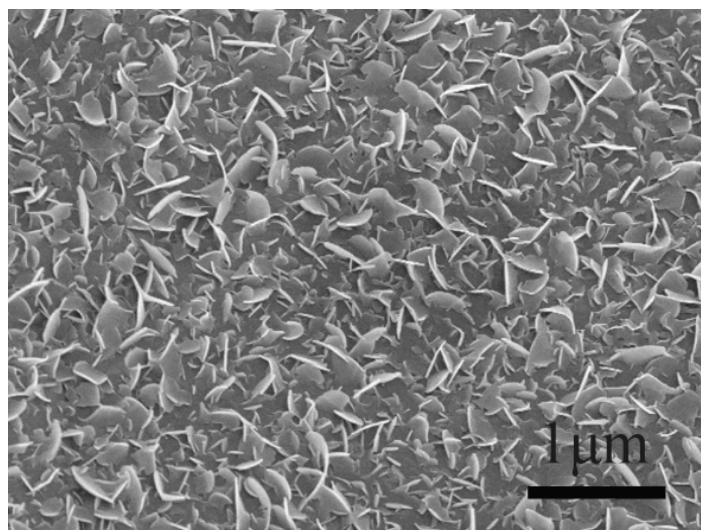

**Fig. S1** Precursor of the Ni@ NPAs.

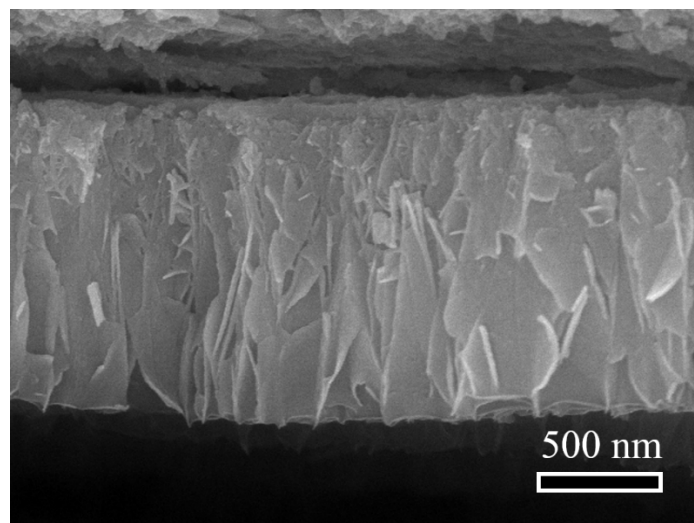

**Fig. S2** Cross-section SEM image of Ni@ NPAs.

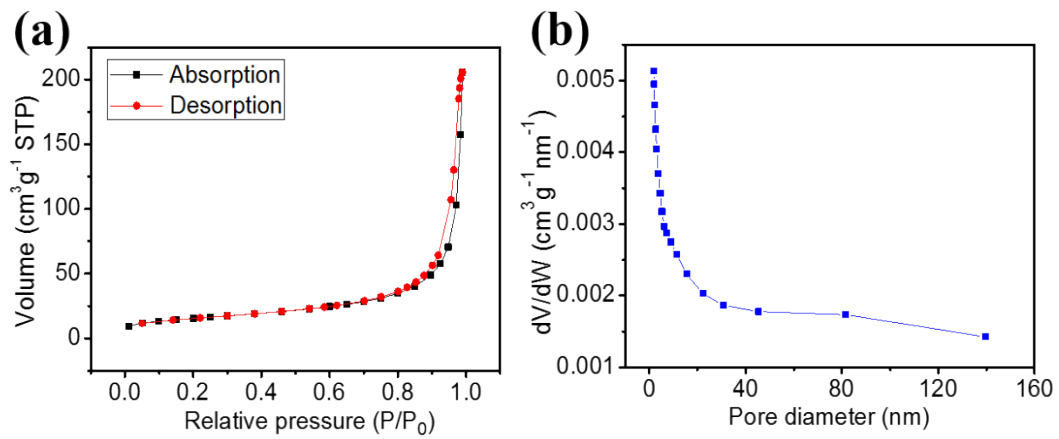

**Fig. S3** (a)  $N_2$  adsorption- desorption isotherm of the  $NiMoO_4$  NPAs. (b) The pore size distribution of the  $NiMoO_4$  NPAs obtained from adsorption branches of corresponding isotherms by BJH method.

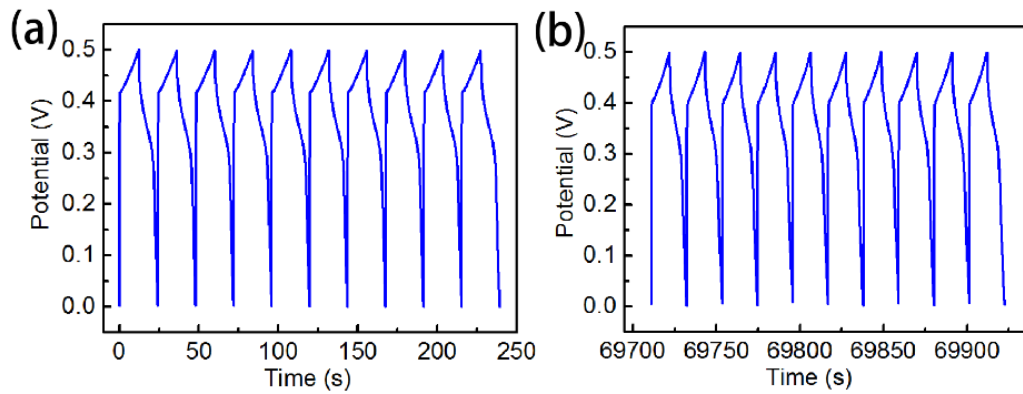

**Fig. S4** Initial and last ten cycles of the  $Ni@NPAs$  electrode at a current density of  $60 \text{ mA cm}^{-2}$ .

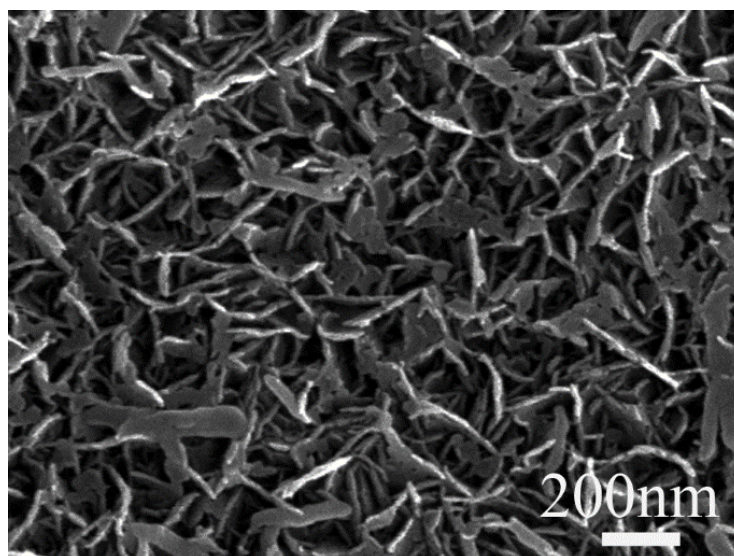

**Fig. S5** FE-SEM of  $Ni@NPAs$  after 3000 cycles.
